# Supplementary material for: Experiences Shared by the (Future) Public Health Workforce during the COVD-19 Pandemic in Germany: Results of a Survey on Workload, Work Content, and Related Challenges among Students and Young Professionals
Source: MDPI journal article supplement (doi:10.3390/ijerph191811444), 2022-09-11
Supplement: s1 [file s1]

## Supplementary materials

**Table S1.** Experiences of students enrolled for more than 3 semesters, stratified for gender, age, number of semesters absolved, and graduation status (n=76).

|                       | Gender    |           | SMD   | Age in years |           |           | SMD   | Semesters absolved |           | SMD   | Graduation during COVID-19 pandemic |           | SMD   |
|-----------------------|-----------|-----------|-------|--------------|-----------|-----------|-------|--------------------|-----------|-------|-------------------------------------|-----------|-------|
|                       | Male      | Female    |       | ≤27          | 28–<38    | ≥38       |       | 4-10               | ≥11       |       | yes                                 | no        |       |
| n                     | 16        | 57        |       | 43           | 29        | 4         |       | 48                 | 28        |       | 21                                  | 53        |       |
| <b>Money</b>          |           |           | 0.493 |              |           |           | 0.913 |                    |           | 0.403 |                                     |           | 0.504 |
| very burdened         | 0 (0.0)   | 3 (5.5)   |       | 1 (2.4)      | 2 (7.1)   | 0 (0.0)   |       | 1 (2.2)            | 2 (7.4)   |       | 0 (0.0)                             | 3 (6.0)   |       |
| burdened              | 1 (5.6)   | 8 (14.5)  |       | 6 (14.6)     | 3 (10.7)  | 0 (0.0)   |       | 5 (10.9)           | 4 (14.8)  |       | 3 (14.3)                            | 6 (12.0)  |       |
| less burdened         | 4 (22.2)  | 13 (23.6) |       | 12 (29.3)    | 5 (17.9)  | 0 (0.0)   |       | 13 (28.3)          | 4 (14.8)  |       | 7 (33.3)                            | 9 (18.0)  |       |
| not burdened          | 13 (72.2) | 31 (56.4) |       | 22 (53.7)    | 18 (64.3) | 4 (100.0) |       | 27 (58.7)          | 17 (63.0) |       | 11 (52.4)                           | 32 (64.0) |       |
| NA=3                  |           |           |       |              |           |           |       |                    |           |       |                                     |           |       |
| <b>Lecturer</b>       |           |           | 0.511 |              |           |           | 1.045 |                    |           | 0.182 |                                     |           | 0.436 |
| very burdened         | 5 (27.8)  | 15 (26.3) |       | 14 (32.6)    | 6 (21.4)  | 0 (0.0)   |       | 12 (25.0)          | 8 (29.6)  |       | 5 (23.8)                            | 15 (28.8) |       |
| burdened              | 7 (38.9)  | 25 (43.9) |       | 16 (37.2)    | 13 (46.4) | 3 (75.0)  |       | 22 (45.8)          | 10 (37.0) |       | 7 (33.3)                            | 25 (48.1) |       |
| less burdened         | 2 (11.1)  | 13 (22.8) |       | 8 (18.6)     | 7 (25.0)  | 0 (0.0)   |       | 9 (18.8)           | 6 (22.2)  |       | 6 (28.6)                            | 8 (15.4)  |       |
| not burdened          | 4 (22.2)  | 4 (7.0)   |       | 5 (11.6)     | 2 (7.1)   | 1 (25.0)  |       | 5 (10.4)           | 3 (11.1)  |       | 3 (14.3)                            | 4 (7.7)   |       |
| NA=1                  |           |           |       |              |           |           |       |                    |           |       |                                     |           |       |
| <b>Co-student</b>     |           |           | 0.447 |              |           |           | 1.071 |                    |           | 0.043 |                                     |           | 0.316 |
| very burdened         | 10 (55.6) | 34 (59.6) |       | 32 (74.4)    | 11 (39.3) | 1 (25.0)  |       | 28 (58.3)          | 16 (59.3) |       | 12 (57.1)                           | 32 (61.5) |       |
| burdened              | 4 (22.2)  | 18 (31.6) |       | 7 (16.3)     | 14 (50.0) | 1 (25.0)  |       | 14 (29.2)          | 8 (29.6)  |       | 7 (33.3)                            | 14 (26.9) |       |
| less burdened         | 2 (11.1)  | 4 (7.0)   |       | 4 (9.3)      | 1 (3.6)   | 1 (25.0)  |       | 4 (8.3)            | 2 (7.4)   |       | 2 (9.5)                             | 4 (7.7)   |       |
| not burdened          | 2 (11.1)  | 1 (1.8)   |       | 0 (0.0)      | 2 (7.1)   | 1 (25.0)  |       | 2 (4.2)            | 1 (3.7)   |       | 0 (0.0)                             | 2 (3.8)   |       |
| NA=1                  |           |           |       |              |           |           |       |                    |           |       |                                     |           |       |
| <b>Material</b>       |           |           | 0.374 |              |           |           | 0.960 |                    |           | 0.504 |                                     |           | 0.339 |
| very burdened         | 3 (16.7)  | 3 (5.3)   |       | 4 (9.3)      | 2 (7.1)   | 0 (0.0)   |       | 4 (8.3)            | 2 (7.4)   |       | 1 (4.8)                             | 5 (9.6)   |       |
| burdened              | 5 (27.8)  | 17 (29.8) |       | 12 (27.9)    | 10 (35.7) | 0 (0.0)   |       | 14 (29.2)          | 8 (29.6)  |       | 7 (33.3)                            | 14 (26.9) |       |
| less burdened         | 5 (27.8)  | 18 (31.6) |       | 15 (34.9)    | 7 (25.0)  | 1 (25.0)  |       | 18 (37.5)          | 5 (18.5)  |       | 5 (23.8)                            | 18 (34.6) |       |
| not burdened          | 5 (27.8)  | 19 (33.3) |       | 12 (27.9)    | 9 (32.1)  | 3 (75.0)  |       | 12 (25.0)          | 12 (44.4) |       | 8 (38.1)                            | 15 (28.8) |       |
| NA=1                  |           |           |       |              |           |           |       |                    |           |       |                                     |           |       |
| <b>Quiet place</b>    |           |           | 0.109 |              |           |           | 1.366 |                    |           | 0.252 |                                     |           | 0.306 |
| very burdened         | 7 (36.8)  | 21 (36.8) |       | 18 (41.9)    | 10 (34.5) | 0 (0.0)   |       | 16 (33.3)          | 12 (42.9) |       | 9 (42.9)                            | 19 (35.8) |       |
| burdened              | 4 (21.1)  | 14 (24.6) |       | 11 (25.6)    | 7 (24.1)  | 0 (0.0)   |       | 11 (22.9)          | 7 (25.0)  |       | 3 (14.3)                            | 14 (26.4) |       |
| less burdened         | 4 (21.1)  | 12 (21.1) |       | 9 (20.9)     | 5 (17.2)  | 2 (50.0)  |       | 11 (22.9)          | 5 (17.9)  |       | 5 (23.8)                            | 11 (20.8) |       |
| not burdened          | 4 (21.1)  | 10 (17.5) |       | 5 (11.6)     | 7 (24.1)  | 2 (50.0)  |       | 10 (20.8)          | 4 (14.3)  |       | 4 (19.0)                            | 9 (17.0)  |       |
| NA=0                  |           |           |       |              |           |           |       |                    |           |       |                                     |           |       |
| <b>Something else</b> |           |           | 0.713 |              |           |           | NaN   |                    |           | 1.088 |                                     |           | 1.014 |
| very burdened         | 2 (66.7)  | 5 (50.0)  |       | 5 (62.5)     | 2 (40.0)  | 0 (NaN)   |       | 3 (37.5)           | 4 (80.0)  |       | 2 (40.0)                            | 5 (62.5)  |       |
| burdened              | 1 (33.3)  | 3 (30.0)  |       | 2 (25.0)     | 2 (40.0)  | 0 (NaN)   |       | 3 (37.5)           | 1 (20.0)  |       | 2 (40.0)                            | 2 (25.0)  |       |
| less burdened         | 0 (0.0)   | 1 (10.0)  |       | 1 (12.5)     | 0 (0.0)   | 0 (NaN)   |       | 1 (12.5)           | 0 (0.0)   |       | 0 (0.0)                             | 1 (12.5)  |       |
| not burdened          | 0 (0.0)   | 1 (10.0)  |       | 0 (0.0)      | 1 (20.0)  | 0 (NaN)   |       | 1 (12.5)           | 0 (0.0)   |       | 1 (20.0)                            | 0 (0.0)   |       |
| NA=63                 |           |           |       |              |           |           |       |                    |           |       |                                     |           |       |

Legend: "During the COVID-19 pandemic, I experienced..."

Money: "...financing my student status as..."; Lecturer: "...lack of exchange with lecturers as..."; Co-student: "...lack of exchange with fellow students as..."; Material: "...lack of access to learning materials as..."; Quiet place: "...lack of access to undisturbed/quiet workplaces as..."; Something else: "...something else I would like mention as...".

NA: not applicable; SMD: standard mean difference
